# Supplementary material for: Molecular alterations and potential actionable mutations in peritoneal mesothelioma: a scoping review of high-throughput sequencing studies
Source: PubMed Central journal article supplement (PMC10368826; doi:10.1016/j.esmoop.2023.101600), 2023-07-13

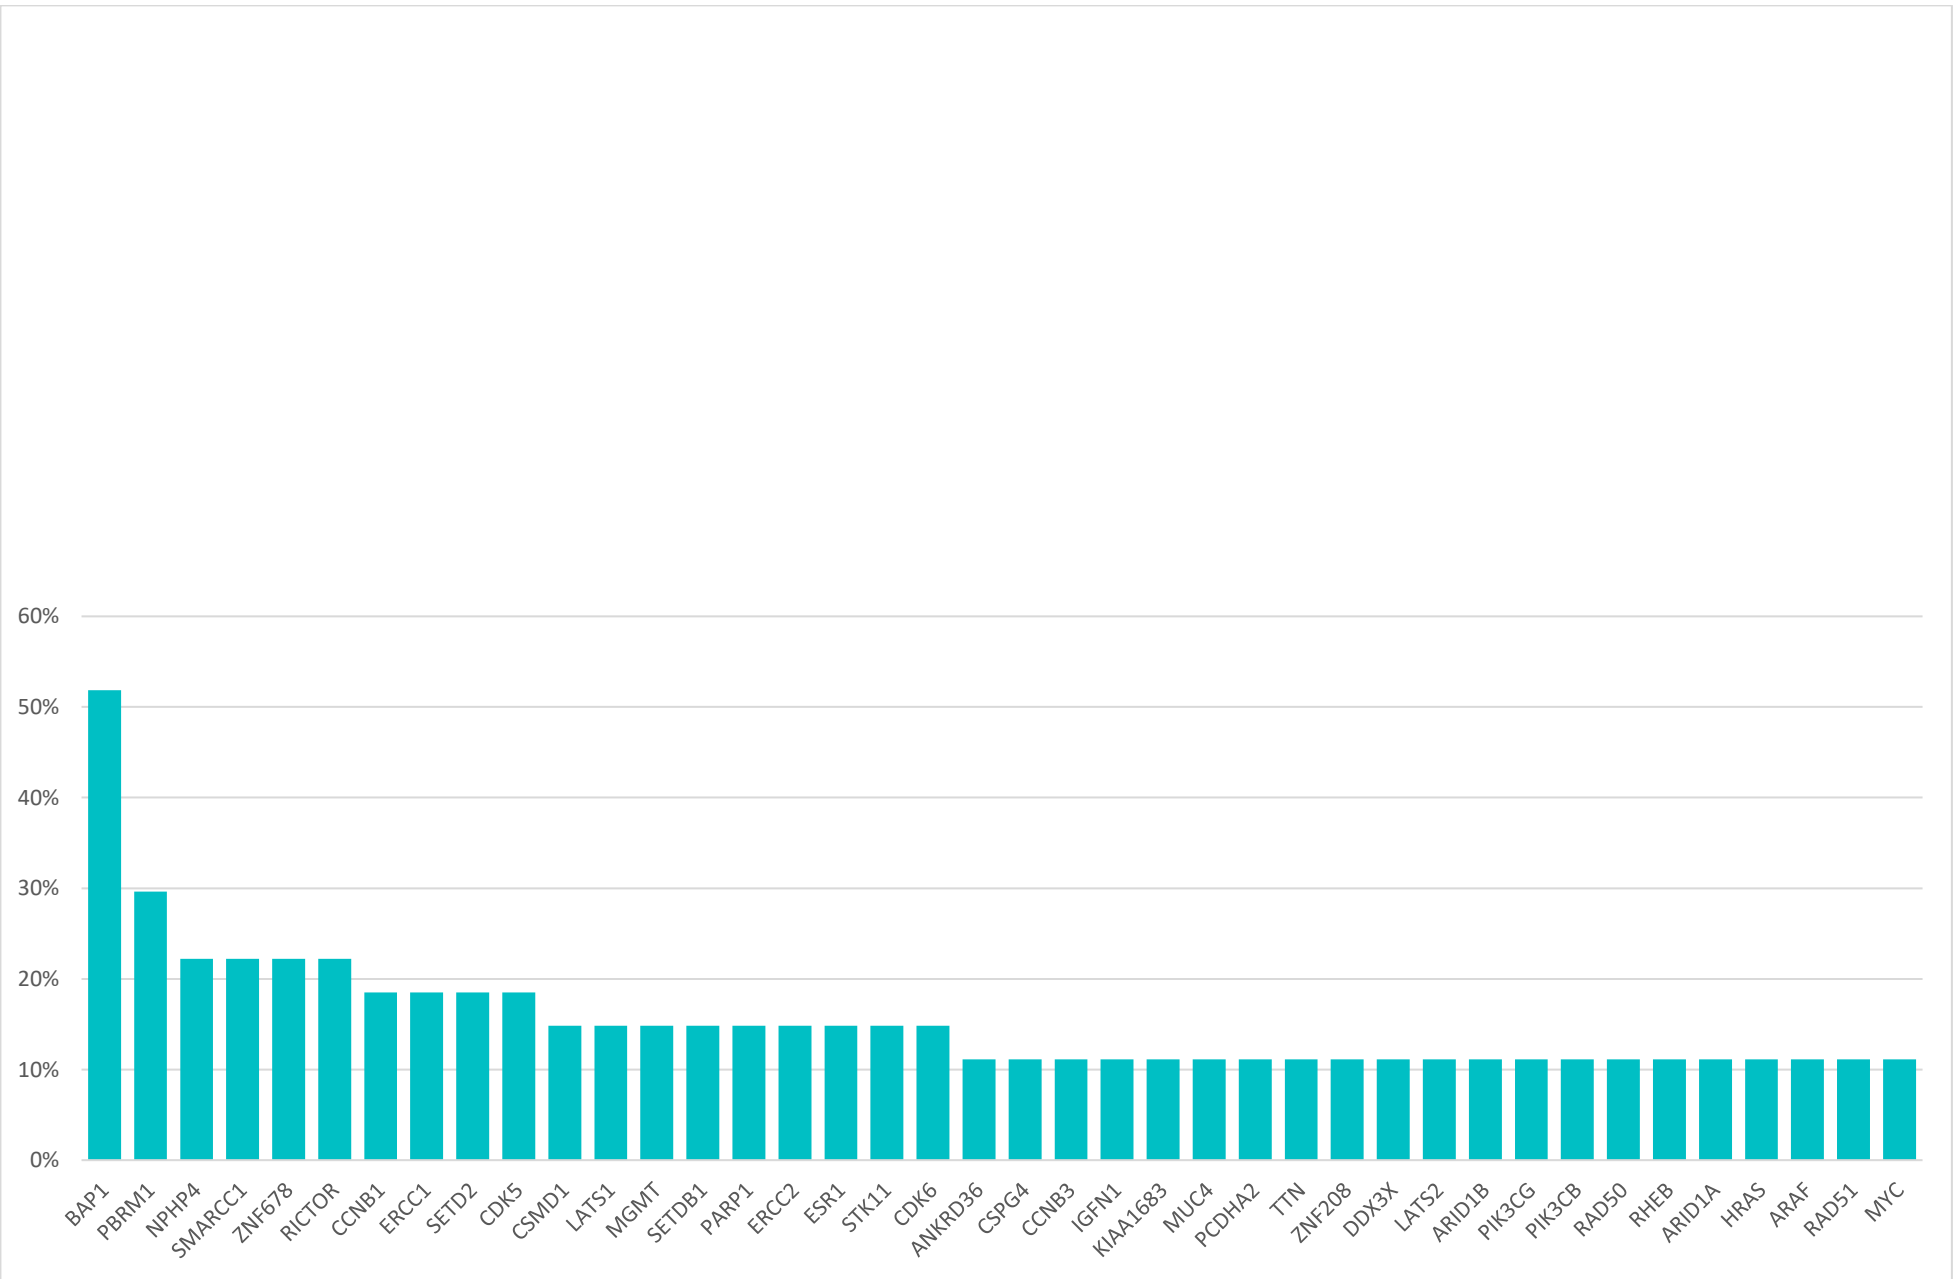

Supplement: mmc1.pdf [file mmc1.pdf]
